# Supplementary material for: IFITM3, FURIN, ACE1, and TNF-α Genetic Association With COVID-19 Outcomes: Systematic Review and Meta-Analysis
Source: PubMed Central journal article supplement (PMC9010674; doi:10.3389/fgene.2022.775246), 2022-04-01
Supplement: DataSheet1.pdf [file DataSheet1.pdf]

***IFITM3, FURIN, ACE1 and TNF- $\alpha$*  genetic association with Covid-19 outcomes: systematic review  
and meta-analysis**

João Locke Ferreira de Araújo<sup>1</sup>; Diego Menezes <sup>1</sup>;  
Renato Santana de Aguiar<sup>1</sup>; Renan Pedra de Souza <sup>1</sup>

<sup>1</sup> Grupo de Pesquisa em Bioestatística e Epidemiologia Molecular; Laboratório de Biologia Integrativa; Programa de Pós Graduação em Genética; Departamento de Genética, Ecologia e Evolução; Instituto de Ciências Biológicas; Universidade Federal de Minas Gerais

**Running Title:** *IFITM3, FURIN, ACE1 and TNF- $\alpha$*  SNPs and Covid-19

**Corresponding author**

Renan P. Souza (renanrps@ufmg.br)

Universidade Federal de Minas Gerais

Av. Antônio Carlos, 6627 ICB - Pampulha

31270901 - Belo Horizonte - Minas Gerais - Brazil

Phone: +553134092570

## Supplementary material 1

Search strategy

### *IFITM3* gene

(SARS-Cov-2[Title/Abstract] OR covid-19[Title/Abstract] OR 2019-nCov [Title/Abstract] OR SARS-CoV2 [Title/Abstract])

AND

(allele[Title/Abstract] OR genotype[Title/Abstract] OR "genes"[MeSH Terms] OR "polymorphism, genetic"[MeSH Terms] OR "genetic association studies"[MeSH Terms] OR "genotype"[MeSH Terms] OR "genetic predisposition to disease"[MeSH Terms] OR "genetic variation"[MeSH Terms] OR "alleles"[Title/Abstract] OR "genes"[Title/Abstract] OR "polymorphism, genetic"[Title/Abstract] OR "genetic association studies"[Title/Abstract] OR "genotype"[Title/Abstract] OR "genetic predisposition to disease"[Title/Abstract] OR "genetic variation"[Title/Abstract] OR "alleles"[Title/Abstract])

AND

(IFITM3 [Title/Abstract] OR “Interferon Induced Transmembrane Protein 3” [Title/Abstract] OR DSPA2b [Title/Abstract] OR “Interferon-Induced Transmembrane Protein 3” [Title/Abstract] OR “Interferon-Inducible Protein 1-8U” [Title/Abstract] OR 1-8U [Title/Abstract] OR “Interferon Induced Transmembrane Protein 3 (1-8U)” [Title/Abstract] OR IP15 [Title/Abstract])

### *FURIN* gene

(SARS-Cov-2[Title/Abstract] OR covid-19[Title/Abstract] OR 2019-nCov [Title/Abstract] OR SARS-CoV2 [Title/Abstract])

AND

(allele[Title/Abstract] OR genotype[Title/Abstract] OR "genes"[MeSH Terms] OR "polymorphism, genetic"[MeSH Terms] OR "genetic association studies"[MeSH Terms] OR "genotype"[MeSH Terms] OR "genetic predisposition to disease"[MeSH Terms] OR "genetic variation"[MeSH Terms] OR "alleles"[Title/Abstract] OR "genes"[Title/Abstract] OR "polymorphism, genetic"[Title/Abstract] OR "genetic association studies"[Title/Abstract] OR "genotype"[Title/Abstract] OR "genetic predisposition to disease"[Title/Abstract] OR "genetic variation"[Title/Abstract] OR "alleles"[Title/Abstract])

AND

(Furin [Title/Abstract] OR “Furin, Paired Basic Amino Acid Cleaving Enzyme” [Title/Abstract] OR “Paired Basic Amino Acid Residue-Cleaving Enzyme” [Title/Abstract] OR “Proprotein Convertase Subtilisin/Kexin 3” [Title/Abstract] OR “Subtilisin-Like Proprotein Convertase 1” [Title/Abstract] OR “EC 3.4.21.75” [Title/Abstract] OR PCSK3 [Title/Abstract] OR PACE [Title/Abstract] OR SPC1 [Title/Abstract])

### *ACE1* gene

(SARS-Cov-2[Title/Abstract] OR covid-19[Title/Abstract] OR 2019-nCov [Title/Abstract] OR SARS-CoV2 [Title/Abstract])

AND

(allele[Title/Abstract] OR genotype[Title/Abstract] OR "genes"[MeSH Terms] OR "polymorphism, genetic"[MeSH Terms] OR "genetic association studies"[MeSH Terms] OR "genotype"[MeSH Terms] OR "genetic predisposition to disease"[MeSH Terms] OR "genetic variation"[MeSH Terms] OR "alleles"[Title/Abstract] OR "genes"[Title/Abstract] OR "polymorphism, genetic"[Title/Abstract] OR "genetic association studies"[Title/Abstract] OR "genotype"[Title/Abstract] OR "genetic predisposition to disease"[Title/Abstract] OR "genetic variation"[Title/Abstract] OR "alleles"[Title/Abstract])

AND

(ACE1 [Title/Abstract] OR “Angiotensin I Converting Enzyme” [Title/Abstract] OR “Angiotensin I Converting Enzyme (Peptidyl-Dipeptidase A) 1” [Title/Abstract] OR “Angiotensin-Converting Enzyme” [Title/Abstract] OR “Dipeptidyl Carboxypeptidase I” [Title/Abstract] OR “CD143 Antigen” [Title/Abstract] OR “Kininase II” [Title/Abstract] OR CD143 [Title/Abstract] OR DCP1 [Title/Abstract] OR DCP [Title/Abstract] OR “Dipeptidyl Carboxypeptidase 1” [Title/Abstract] OR “Peptidyl-Dipeptidase A” [Title/Abstract] OR Carboxycathepsin [Title/Abstract] OR “Peptidase P” [Title/Abstract] OR “EC 3.4.15.1” [Title/Abstract] OR “EC 3.2.1” [Title/Abstract] OR ACE [Title/Abstract] OR ECA [Title/Abstract])

### ***TNF- $\alpha$ gene***

(SARS-Cov-2[Title/Abstract] OR covid-19[Title/Abstract] OR 2019-nCov [Title/Abstract] OR SARS-CoV2 [Title/Abstract])

AND

(allele[Title/Abstract] OR genotype[Title/Abstract] OR "genes"[MeSH Terms] OR "polymorphism, genetic"[MeSH Terms] OR "genetic association studies"[MeSH Terms] OR "genotype"[MeSH Terms] OR "genetic predisposition to disease"[MeSH Terms] OR "genetic variation"[MeSH Terms] OR "alleles"[Title/Abstract] OR "genes"[Title/Abstract] OR "polymorphism, genetic"[Title/Abstract] OR "genetic association studies"[Title/Abstract] OR "genotype"[Title/Abstract] OR "genetic predisposition to disease"[Title/Abstract] OR "genetic variation"[Title/Abstract] OR "alleles"[Title/Abstract])

AND

(TNF [Title/Abstract] OR “Tumor Necrosis Factor” [Title/Abstract] OR “TNF-Alpha” [Title/Abstract] OR TNFSF2 [Title/Abstract] OR “Tumor Necrosis Factor Ligand Superfamily Member 2” [Title/Abstract] OR TNF-A [Title/Abstract] OR TNFA [Title/Abstract] OR DIF [Title/Abstract] OR “Tumor Necrosis Factor (TNF Superfamily, Member 2)” [Title/Abstract] OR “Tumor Necrosis Factor Ligand 1F “ [Title/Abstract] OR “Tumor Necrosis Factor-Alpha” [Title/Abstract] OR “TNF Superfamily, Member 2” [Title/Abstract] OR “TNF, Macrophage-Derived” [Title/Abstract] OR “TNF, Monocyte-Derived” [Title/Abstract] OR “APC1 Protein” [Title/Abstract] OR Cachectin [Title/Abstract] OR TNLG1F [Title/Abstract])

Table S1: Q-Genie quality results of the included reports in the metanalysis.

| Authors                   | Gene          | Question 1 | Question 2 | Question 3 | Question 4 | Question 5 | Question 6 | Question 7 | Question 8 | Question 9 | Question 10 | Question 11 | Final | Concept  |
|---------------------------|---------------|------------|------------|------------|------------|------------|------------|------------|------------|------------|-------------|-------------|-------|----------|
| Zhang et al., 2020        | <i>IFTIM3</i> | 5.00       | 3.67       | 3.00       | 1.00       | 1.00       | 3.00       | 1.00       | 7.00       | 5.00       | 1.00        | 7.00        | 37.67 | Moderate |
| Gómez et al., 2021        | <i>IFTIM3</i> | 7.00       | 3.00       | 2.50       | 5.00       | 1.00       | 5.00       | 2.00       | 3.50       | 5.00       | 3.00        | 3.00        | 40.00 | Moderate |
| Alghamdi et al., 2021     | <i>IFTIM3</i> | 7.00       | 1.67       | 1.50       | 3.00       | 1.00       | 7.00       | 4.00       | 7.00       | 5.00       | 1.00        | 3.00        | 41.17 | Moderate |
| Schonfelder at al., 2021  | <i>IFTIM3</i> | 7.00       | 4.00       | 3.25       | 3.00       | 1.00       | 5.00       | 2.00       | 5.00       | 6.33       | 3.00        | 7.00        | 46.58 | Good     |
| Cuesta-Llavona et al 2021 | <i>IFTIM3</i> | 7.00       | 5.00       | 4.00       | 2.67       | 1.00       | 7.00       | 7.00       | 6.00       | 7.00       | 3.00        | 7.00        | 56.67 | Good     |
| Gòmez et al., 2020        | <i>ACE1</i>   | 7.00       | 4.33       | 3.50       | 2.20       | 1.00       | 7.00       | 2.00       | 4.50       | 7.00       | 1.00        | 7.00        | 46.53 | Good     |
| Verma et al., 2021        | <i>ACE1</i>   | 5.00       | 3.67       | 3.00       | 3.40       | 1.00       | 7.00       | 3.00       | 5.50       | 7.00       | 1.00        | 3.00        | 42.57 | Moderate |
| Gunal et al., 2021        | <i>ACE1</i>   | 7.00       | 3.00       | 2.50       | 2.20       | 1.00       | 7.00       | 4.00       | 7.00       | 7.00       | 1.00        | 5.00        | 46.70 | Good     |
| Çelik et al., 2021        | <i>ACE1</i>   | 7.00       | 3.00       | 2.50       | 2.20       | 1.00       | 5.00       | 1.00       | 7.00       | 5.67       | 3.00        | 7.00        | 44.37 | Good     |
| Akbari et al., 2021       | <i>ACE1</i>   | 7.00       | 3.67       | 2.50       | 4.67       | 1.00       | 5.00       | 3.50       | 6.50       | 5.67       | 2.00        | 5.00        | 46.50 | Good     |
| Aladag et al., 2021       | <i>ACE1</i>   | 7.00       | 3.67       | 2.50       | 4.00       | 1.00       | 7.00       | 4.00       | 6.00       | 5.00       | 3.00        | 7.00        | 50.17 | Good     |
| Mir et al., 2021          | <i>ACE1</i>   | 7.00       | 4.33       | 2.00       | 6.00       | 1.00       | 7.00       | 4.00       | 6.50       | 5.00       | 3.00        | 4.00        | 49.83 | Good     |
| Annunziata et al 2021     | <i>ACE1</i>   | 7.00       | 1.00       | 2.50       | 1.00       | 1.00       | 7.00       | 1.50       | 2.50       | 3.00       | 1.00        | 1.00        | 28.50 | Poor     |
| Cafiero et al 2021        | <i>ACE1</i>   | 7.00       | 1.67       | 1.00       | 1.67       | 1.00       | 1.00       | 2.00       | 6.00       | 4.33       | 3.00        | 7.00        | 35.67 | Moderate |
| Kouhpayeh et al 2021      | <i>ACE1</i>   | 7.00       | 3.67       | 3.00       | 5.00       | 1.00       | 3.00       | 4.00       | 6.50       | 5.67       | 3.00        | 4.00        | 45.83 | Good     |
| Mahmood et al 2022        | <i>ACE1</i>   | 7.00       | 3.67       | 3.00       | 2.67       | 1.00       | 3.00       | 6.50       | 6.00       | 5.67       | 1.00        | 5.00        | 44.50 | Moderate |
| Möhlendick et al 2021     | <i>ACE1</i>   | 7.00       | 4.33       | 2.50       | 2.33       | 1.00       | 7.00       | 4.00       | 5.50       | 7.00       | 3.00        | 7.00        | 50.67 | Good     |
| Papadopoulou et al 2021   | <i>ACE1</i>   | 7.00       | 3.00       | 4.00       | 4.00       | 1.00       | 5.00       | 4.00       | 6.00       | 5.67       | 3.00        | 5.00        | 47.67 | Good     |
| Saad et al 2021           | <i>ACE1</i>   | 7.00       | 3.00       | 1.00       | 4.00       | 1.00       | 7.00       | 4.00       | 7.00       | 7.00       | 5.00        | 7.00        | 53.00 | Good     |
| Gong et al., 2022         | <i>ACE1</i>   | 3.00       | 5.00       | 5.50       | 2.33       | 1.00       | 7.00       | 4.00       | 6.50       | 3.00       | 3.00        | 3.00        | 43.33 | Moderate |
| Hubacek et al., 2021      | <i>ACE1</i>   | 7.00       | 1.00       | 1.50       | 3.00       | 1.00       | 1.00       | 4.00       | 2.50       | 1.00       | 1.00        | 7.00        | 30.00 | Poor     |
